# Supplementary material for: Calpain-2 Enhances Non-Small Cell Lung Cancer Progression and Chemoresistance to Paclitaxel via EGFR-pAKT Pathway
Source: PubMed Central journal article supplement — Int J Biol Sci. 2019 Jan 6;15(1):127–37. doi: 10.7150/ijbs.28834 (PMC6329934; doi:10.7150/ijbs.28834), 2019-01-06
Supplement: ijbsv15p0127s1.pdf [file ijbsv15p0127s1.pdf]

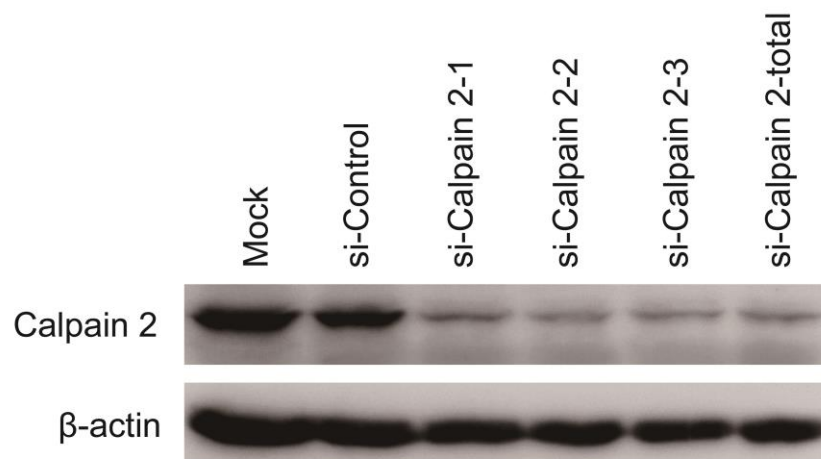

Fig S1: the effect of the knockdown was validated through Western blot analyses.  $\beta$ -actin was used as an internal reference.

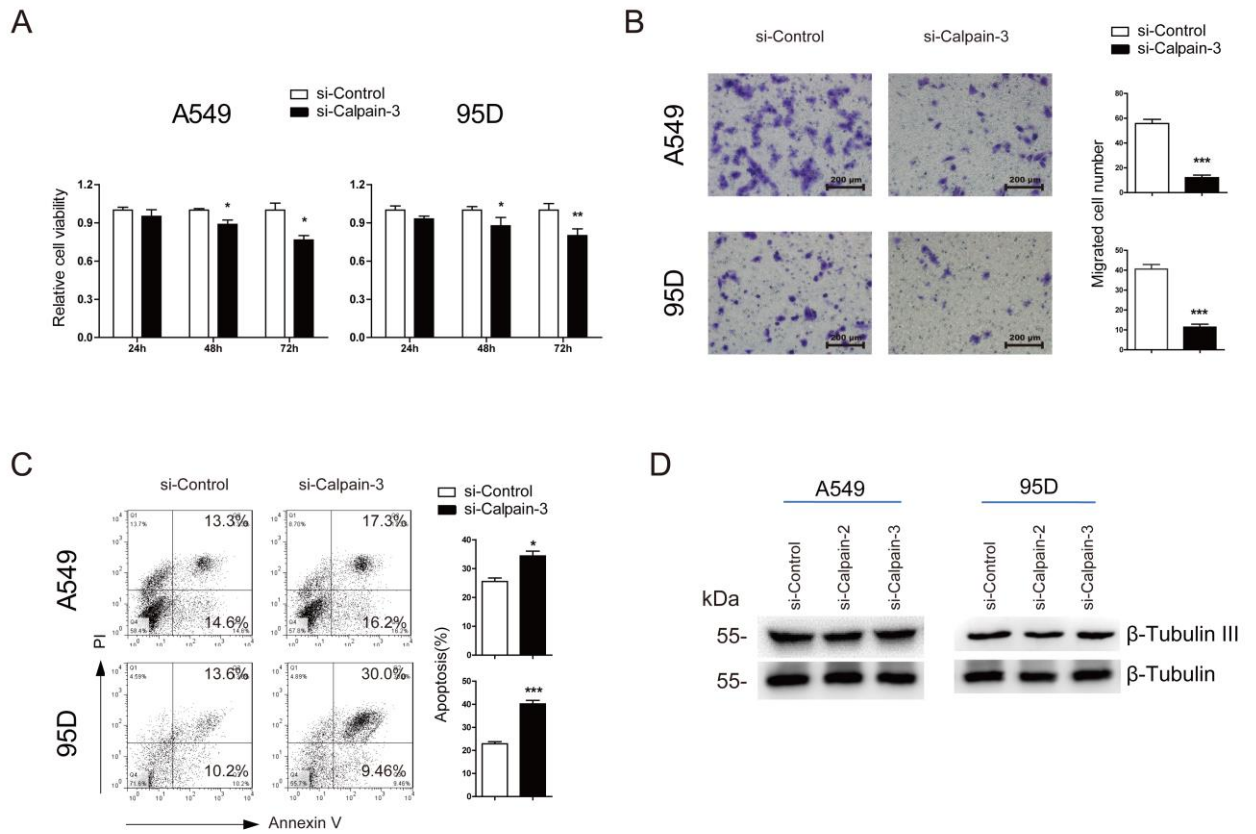

Fig S2: Calpain-2 promotes the progression of NSCLC. (A) The proliferative ability was assessed with CCK-8 assay at 24, 48 and 72 hours after transfection. (B) The migration ability was assessed with Transwell assay. (C) The apoptosis of cells was detected with flow cytometry after staining of Annexin V and PI. (D) Western blot was performed to analyze the expression difference of the  $\beta$ -tubulin and  $\beta$ -tubulin III after knockdown of Calpain-2. (ns: no significance, \* $p < 0.05$ , \*\* $p < 0.01$ , \*\*\* $p < 0.001$ ).

**Table S1: Antibodies used for Western blot**

| Antibody                                  | Company                   | Catalog No. |
|-------------------------------------------|---------------------------|-------------|
| EGFR                                      | Epitomics                 | 2116-S      |
| pEGFR                                     | Epitomics                 | 1727-1      |
| AKT                                       | Cell Signaling Technology | 9272        |
| pAKT                                      | Cell Signaling Technology | 2965P       |
| ERK                                       | Cell Signaling Technology | 4695S       |
| pERK                                      | Cell Signaling Technology | 4370S       |
| E-cadherin                                | Abcam                     | Ab1416      |
| Vimentin                                  | Santa Cruz                | sc-32322    |
| MMP-9                                     | Boster                    | BA0573      |
| MMP-2                                     | Boster                    | BA0596      |
| $\beta$ -actin                            | Proteintech               | HRP-60008   |
| $\beta$ -tubulin                          | Huabio                    | 0807-2      |
| $\beta$ -tubulin III                      | Abcam                     | Ab18207     |
| Secondary antibody (goat anti-rabbit IgG) | Beyotime                  | A0208       |
| Secondary antibody (goat anti-mouse IgG)  | Beyotime                  | A0216       |

“p” in the given proteins refers to phosphorylated.
